# Supplementary material for: Indoor Air Quality Assessment in Grocery Stores
Source: MDPI journal article supplement (doi:10.3390/app122412940), 2022-12-16
Supplement: s1 [file s1]

Archive with 1 entries (1 files):
- applsci-2054790-supplementary.pdf
