# Supplementary material for: Indoor Air Quality Assessment in Grocery Stores
Source: MDPI journal article supplement (doi:10.3390/app122412940), 2022-12-16
Supplement: s1 [file s1 › applsci-2054790-supplementary.pdf]

## Supplementary Information

**Table S1.** Summary of the characteristics of the studied GSs, including cleaning procedures and opening periods. N/A – not available information; TS/SS - technical sheet/safety sheet.

| ID  | Characterisation        |                                                        |                 |                   |                                                                                         |                               |                | Cleaning Procedure    |                                               |
|-----|-------------------------|--------------------------------------------------------|-----------------|-------------------|-----------------------------------------------------------------------------------------|-------------------------------|----------------|-----------------------|-----------------------------------------------|
|     | N° of workers           | Type of Facilities                                     | Sales Area (m²) | Storage Area (m²) | Open hours (Week days)                                                                  | Closed days                   | N° clients/day | Period                | Products                                      |
| M1  | 3 (2 male and 1 female) | Grocery and charcuterie                                | 110             | 2                 | 09:00-20:00                                                                             | Sunday                        | 150            | Closing time everyday | Biodegradable environmental friendly products |
| M2  | 2 (1 male and 1 female) | Grocery, charcuterie and pastry                        | 110             | 5                 | 09:00 - 14:00<br>16:00 - 20:00<br>Saturdays:<br>09:00-14:00                             | Saturday afternoon and Sunday | 250            | Closing time everyday | Domestic use products                         |
| M3  | N/A                     | Grocery, coffee shop and confection of food            | 200             | 20                | 08:00 - 19:00<br>Saturdays:<br>08:00-16:00                                              | Sunday                        | 130            | Before open everyday  | Biodegradable environmental friendly products |
| M4  | 7                       | Grocery, with sales of bread, charcuterie and butchery | 200             | N/A               | 07:00 - 13:00<br>15:00 - 20:00<br>Saturdays<br>07:00-17:00                              | Sunday                        | 200-250        | 2 to 3 times a day    | Professional use products with TS/SS          |
| M5  | 2 (1 male and 1 female) | Grocery, charcuterie, bakery, pastry and meals         | 80              | 10                | 09:00 - 20:00                                                                           | Sunday                        | 70-100         | 2 to 3 times a day    | Professional use products with TS/SS          |
| M6  | 2 (1 male and 1 female) | Grocery, charcuterie, bakery and pastry                | 150             | 5                 | 07:30 -14:00<br>16:00 - 20:00                                                           | Sunday                        | 80-90          | Closing time everyday | Domestic use products                         |
| M7  | 2 (1 male and 1 female) | Grocery, charcuterie and bakery                        | 110 m2          | 2m2               | 08:00 - 20:00<br>Saturday:<br>09:00-19:00                                               | Sunday                        | 150            | 2 times a day         | Domestic use products                         |
| M8  | 2 (1 male and 1 female) | Grocery and charcuterie                                | 30 m2           | 5m2               | N/A                                                                                     | Sunday                        | 10             | Closing time everyday | Domestic use products                         |
| M9  | 3 (2 male and 1 female) | Grocery, coffee shop and meals                         | 120 m2          | 2m2               | 08:00 - 18:00                                                                           | Sunday                        | 150- 170       | Closing time everyday | Professional use products with TS/SS          |
| M10 | 3 females               | Grocery, charcuterie and bakery                        | 180 m2          | 40m2              | 08:00 - 20:00<br>Saturday:<br>08:00-19:00                                               | Sunday                        | 200-250        | 2 to 3 times a day    | Professional use products with TS/SS          |
| M11 | 2 (1 male and 1 female) | Grocery and charcuterie                                | 75 m2           | NA                | 09:00 - 13:00<br>16:00 - 20:00<br>Saturday:<br>09:00-13:00                              | Sunday                        | 60 -70         | Closing time everyday | Domestic use products                         |
| M12 | 2 (1 male and 1 female) | Grocery and charcuterie                                | 200 m2          | 20m2              | 08:30 - 13:00<br>14:00 - 20:00<br>Saturday:<br>08:30 - 19:00<br>Sunday:<br>08:30 -13:00 | Sunday afternoon              | 200            | 2 times a day         | Professional use products with TS/SS          |
| M13 | 2 males                 | Grocery and charcuterie                                | 80 m2           | 5m2               | 08:00 - 13:00<br>15:00 - 19:00                                                          | Sunday                        | 80-100         | Closing time everyday | Professional use products with TS/SS          |

**Table S2.** Details of the performed monitoring campaign, including monitoring period and locations of the MBs within the GS.

| Grossery ID | Monitoring period |                  | Monitoring Boxes  |                   |                   |
|-------------|-------------------|------------------|-------------------|-------------------|-------------------|
|             | Start             | End              | AirQ1 (A)         | AirQ2 (B)         | AirQ3 (C)         |
| M1          | 22/11/21 - 10:25  | 25/11/21 - 10:00 | Register          |                   |                   |
| M2          | 22/11/21 - 12:35  | 25/11/21 - 10:30 |                   | Register          |                   |
| M3          | 25/11/21 - 10:51  | 29/11/21 - 10:06 | Register          | Fruits/vegetables | Office            |
| M4          | 29/11/21 - 11:00  | 03/12/21 - 10:30 | Register          | Storage           | Office            |
| M5          | 03/12/21 - 10:50  | 06/12/21 - 10:00 | Register          | Fruits/vegetables | Storage           |
| M6          | 06/12/21 - 10:20  | 10/12/21 - 10:20 | Register          |                   | Fruits/vegetables |
| M7          | 10/12/21 - 11:10  | 14/12/21 - 09:30 | Register          | Hallway           |                   |
| M8          | 14/12/21 - 10:05  | 16/12/21 - 09:30 |                   | Register          | Storage           |
| M9          | 17/01/22 - 12:00  | 19/01/22 - 10:30 | Fruits/vegetables |                   | Register          |
| M10         | 19/01/22 - 10:50  | 22/01/22 - 15:30 | Storage/Office    |                   | Register          |
| M11         | 16/02/22 - 11:40  | 21/02/22 - 11:00 | Register          | Store             |                   |
| M12         | 16/02/22 - 12:00  | 19/02/22 - 16:30 |                   |                   | Register          |
| M13         | 19/02/22 - 16:40  | 21/02/22 - 10:30 |                   | Register          |                   |

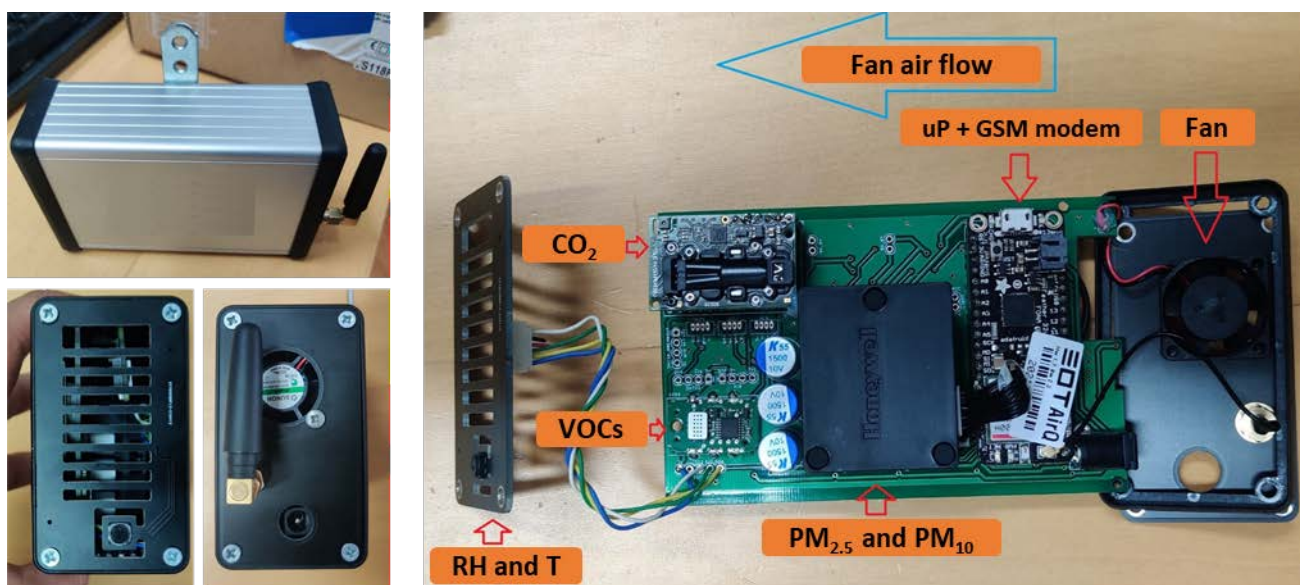

**Figure S1.** Layout of the different low-cost sensors and components within the MB, where uP stands for microcontroller.

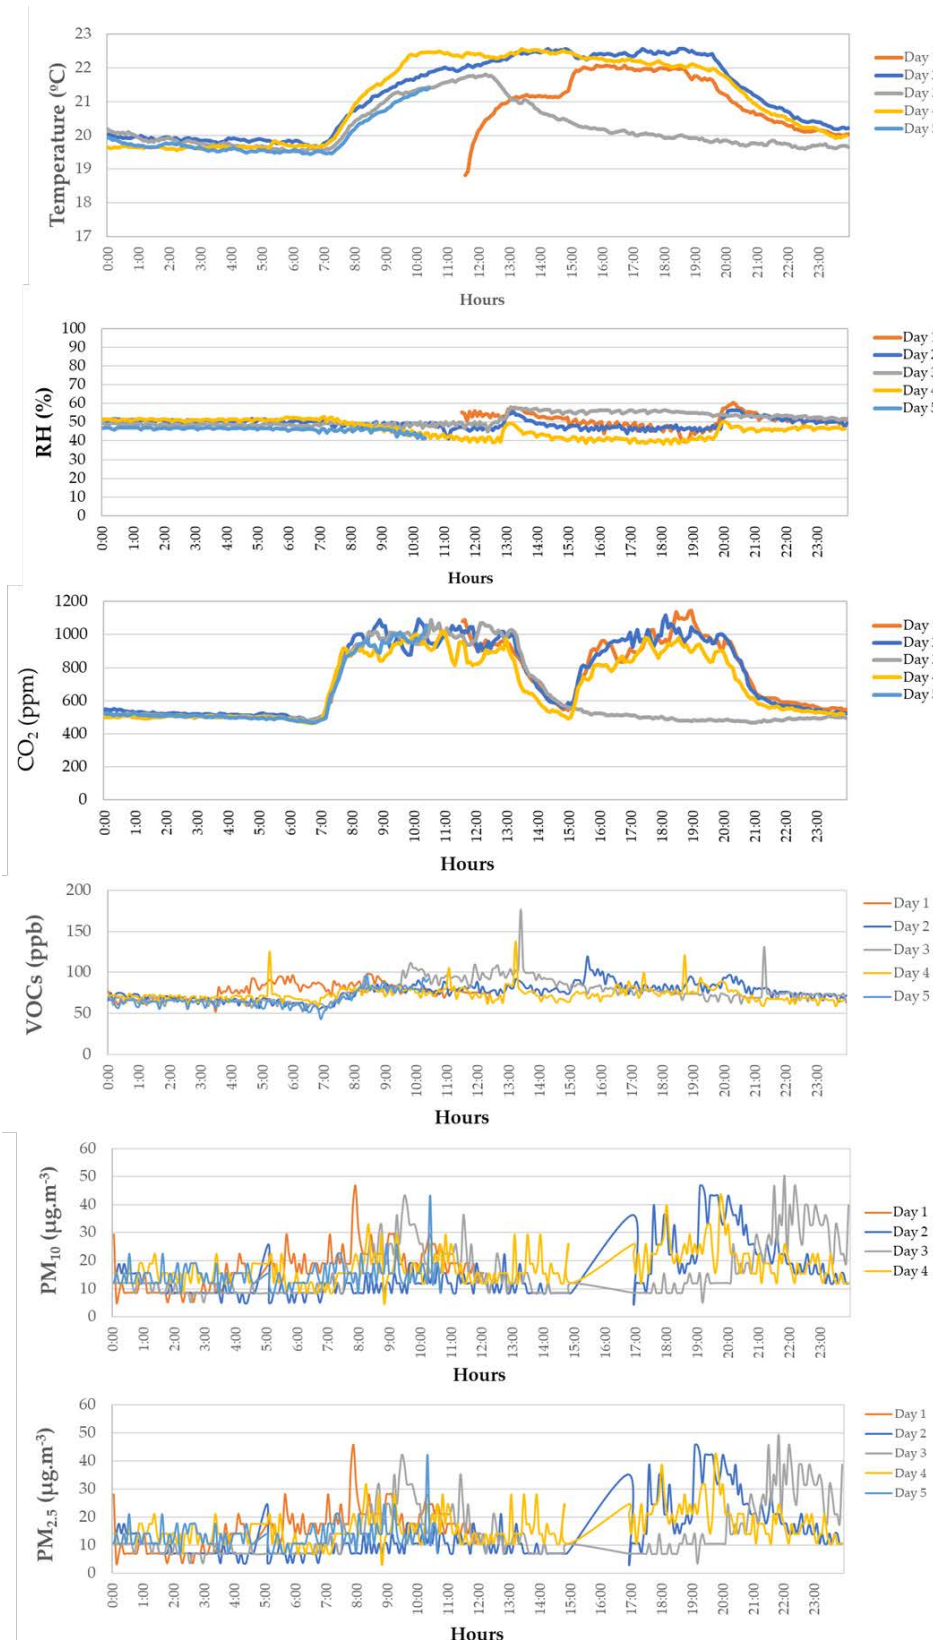

Figure S2. Example of the hourly variability of the GS M4, at location B.
